# Supplementary material for: Role of E270 in pH- and metal-sensitivities of firefly luciferases
Source: Royal Society of Chemistry journal article supplement (doi:10.1039/d0pp00190b), 2020-10-09
Supplement: d0pp00190b1.pdf [file d0pp00190b1.pdf]

## SUPPORTING INFORMATION

### **Role of E270 in pH- and metal-sensitivities of firefly luciferases**

Vadim R. Viviani<sup>1,2\*</sup>, Gabriel. F. Pelentir, V.R. Bevilaqua, Gabriela Oliveira<sup>1</sup>, Frederico C. Arnoldi, Atílio Tomazini<sup>3</sup>

<sup>1</sup>Graduate Program of Evolutive Genetics and Molecular Biology, Federal University of São Carlos (UFSCar), São Carlos, SP

<sup>2</sup>Graduate Program of Biotechnology and Environmental Monitoring, Federal University of São Carlos (UFSCar), Rodovia João Leme dos Santos, Km 110, Itinga, Sorocaba, SP

<sup>3</sup>Brazilian Biorenewables National Laboratory (LNBR), Brazilian Center for Research in Energy and Materials (CNPEN), Campinas, SP, Brazil

Correspondence address: Department of Physics, Chemistry and Mathematics, Federal University of São Carlos (UFSCAR), Rodovia João Leme dos Santos, Km 110, Itinga, Sorocaba, SP. Email: [viviani@ufscar.br](mailto:viviani@ufscar.br)

$$I_{max} = QY \cdot k_{cat} \cdot [Et]$$

$$I_0 = QY \cdot k_{cat} \cdot [ES]$$

$$I_{max} \sim V_{max}$$

$$I_0 = V_0$$

**Equation 1.** Relationships between luminescence intensity and Velocity: ( $I_{max}$ )

maximum intensity; ( $I_0$ ) Initial intensity; (QY) Quantum yield; ( $k_{cat}$ ) catalytic constant; ([Et]) total enzyme concentration; ([ES]) enzyme-substrate complex concentration; ( $V_{max}$ ) maximum velocity and ( $V_0$ ) initial velocity.

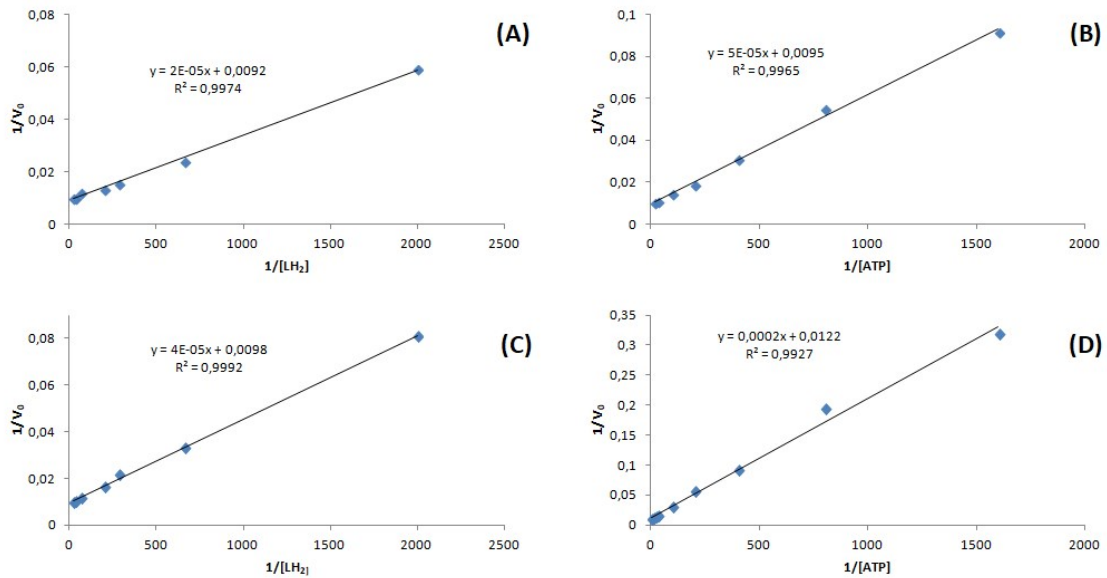

**Supplementary Figure 1.** Lineweaver-Burk Plots for determination of  $K_M$  values for *Amydetes vivianii* luciferase mutants: Amy-E270A: (A) D-luciferin and (B) ATP; Amy-E270G: (C) D-luciferin and (D) ATP. The  $V_0$  values were normalized against  $V_{max}$ , and averages for each point reported.

A

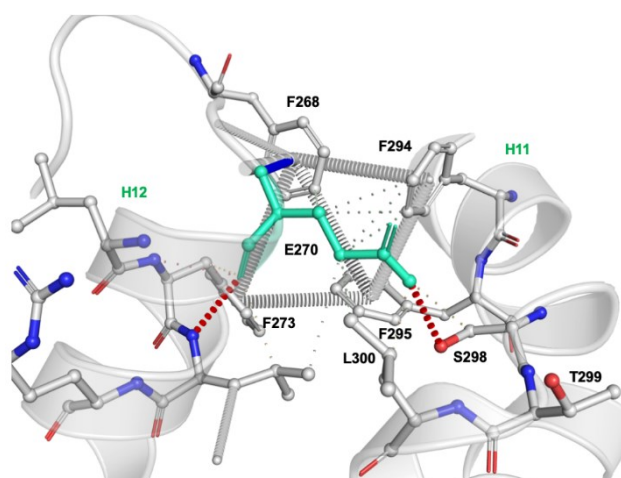

B

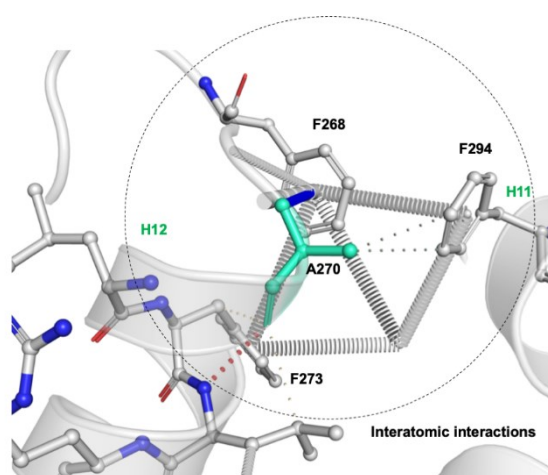

C

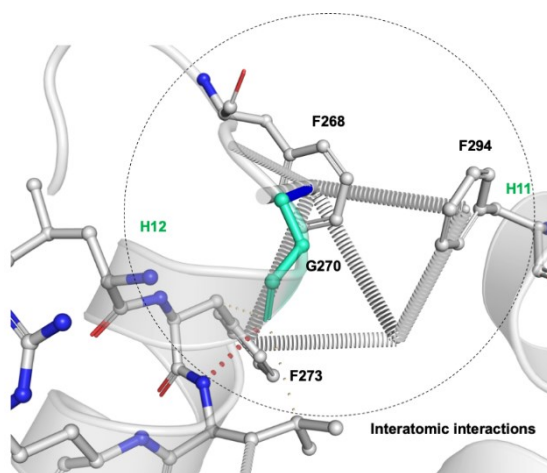

**Supplementary Figure 2.** The effects of mutations on folding, stability, and flexibility predicted by DynaMut. **A)** wild type, **B)** mutated E270A and **C)** mutated E270G luciferase from *Amydetes vivianii*. The interatomic interactions of wild-type and mutant proteins showed that bond interactions were affected as a result of mutation. Bond Type: red (Hydrogen bonds), orange (weak hydrogen bonds) and green (Hydrophobic contacts).
